# Supplementary material
Source: PubMed Central journal article supplement (PMC3638759)
Supplement: NIHMS442634-supplement-Supplementary_Material.pdf [file NIHMS442634-supplement-Supplementary_Material.pdf]

## Supplementary Material

**Table S1. Proteins identified in involved gastric mucosa of Ménétrier's disease patients by shotgun proteomic analysis.**

| Protein                                                    | Gene Name | Full Gene Name                                                                                         | Pre-Treatment counts | Post-Treatment counts | Fold-change | p-value  |
|------------------------------------------------------------|-----------|--------------------------------------------------------------------------------------------------------|----------------------|-----------------------|-------------|----------|
| <b>Proteins with higher spectral counts post-treatment</b> |           |                                                                                                        |                      |                       |             |          |
| IPI00027350.3                                              | PRDX2     | peroxiredoxin 2                                                                                        | 0                    | 16                    | $\infty$    | 0.002309 |
| IPI00032851.1                                              | COPZ1     | coatamer protein complex, subunit zeta 1                                                               | 0                    | 14                    | $\infty$    | 0.002309 |
| IPI00025100.1                                              | BCKDHA    | branched chain keto acid dehydrogenase E1, alpha polypeptide                                           | 0                    | 10                    | $\infty$    | 0.002309 |
| IPI00293867.7                                              | DDT       | D-dopachrome tautomerase                                                                               | 0                    | 10                    | $\infty$    | 0.002309 |
| IPI00418262.4                                              | ALDOC     | aldolase C, fructose-bisphosphate                                                                      | 0                    | 10                    | $\infty$    | 0.002309 |
| IPI00550021.4                                              | RPL3      | ribosomal protein L3                                                                                   | 0                    | 10                    | $\infty$    | 0.002309 |
| IPI00291328.3                                              | NDUFV2    | NADH dehydrogenase (ubiquinone) flavoprotein 2, 24kDa                                                  | 0                    | 9                     | $\infty$    | 0.002309 |
| IPI00012119.1                                              | DCN       | decorin                                                                                                | 0                    | 10                    | $\infty$    | 0.013969 |
| IPI00024915.2                                              | PRDX5     | peroxiredoxin 5                                                                                        | 0                    | 10                    | $\infty$    | 0.013969 |
| IPI00006114.4                                              | SERPINF1  | serpin peptidase inhibitor, clade F (alpha-2 antiplasmin, pigment epithelium derived factor), member 1 | 0                    | 9                     | $\infty$    | 0.013969 |
| IPI00017526.1                                              | S100P     | S100 calcium binding protein P                                                                         | 0                    | 9                     | $\infty$    | 0.013969 |
| IPI00018246.5                                              | HK1       | hexokinase 1                                                                                           | 0                    | 9                     | $\infty$    | 0.019652 |
| IPI00015141.4                                              | CKMT2     | creatine kinase, mitochondrial 2 (sarcomeric)                                                          | 0                    | 8                     | $\infty$    | 0.019652 |
| IPI00003734.1                                              | LOC347701 | calgizzarin-like                                                                                       | 0                    | 8                     | $\infty$    | 0.019652 |
| IPI00006721.3                                              | OPA1      | optic atrophy 1 (autosomal dominant)                                                                   | 0                    | 8                     | $\infty$    | 0.013969 |
| IPI00026665.2                                              | QARS      | glutaminyl-tRNA synthetase                                                                             | 0                    | 8                     | $\infty$    | 0.015987 |
| IPI00604664.4                                              | NDUFS1    | NADH dehydrogenase (ubiquinone) Fe-S protein 1, 75kDa (NADH-coenzyme Q reductase)                      | 0                    | 14                    | $\infty$    | 0.024941 |
| IPI00401776.9                                              | MUC6      | mucin 6, oligomeric mucus/gel-forming                                                                  | 0                    | 11                    | $\infty$    | 0.045686 |
| IPI00026087.1                                              | BANF1     | barrier to autointegration factor 1                                                                    | 0                    | 10                    | $\infty$    | 0.029086 |
| IPI00216694.3                                              | PLS3      | plastin 3 (T isoform)                                                                                  | 2                    | 26                    | 7.978694    | 0.020992 |
| IPI00009893.1                                              | LIPF      | lipase, gastric                                                                                        | 5                    | 47                    | 5.769210    | 0.043437 |
| IPI00075248.11                                             | CALM2     | calmodulin 2 (phosphorylase kinase, delta)                                                             | 5                    | 34                    | 4.173471    | 0.044332 |
| IPI00010896.3                                              | CLIC1     | chloride intracellular channel 1                                                                       | 3                    | 19                    | 3.887056    | 0.044332 |
| IPI00645078.1                                              | UBE1      | ubiquitin-activating enzyme E1                                                                         | 9                    | 52                    | 3.546086    | 0.013969 |
| IPI00456969.1                                              | DYNC1H1   | dynein, cytoplasmic 1, heavy chain 1                                                                   | 6                    | 32                    | 3.273310    | 0.040341 |
| IPI00218919.7                                              | ATP4A     | ATPase, H <sup>+</sup> /K <sup>+</sup> exchanging, alpha polypeptide                                   | 7                    | 36                    | 3.156406    | 0.048786 |
| IPI00009342.1                                              | IQGAP1    | IQ motif containing GTPase activating protein 1                                                        | 10                   | 48                    | 2.945979    | 0.025964 |
| IPI00419237.3                                              | LAP3      | leucine aminopeptidase 3                                                                               | 5                    | 23                    | 2.823230    | 0.029700 |
| IPI00022200.2                                              | COL6A3    | collagen, type VI, alpha 3                                                                             | 23                   | 105                   | 2.801883    | 0.012067 |
| IPI00306959.10                                             | KRT7      | keratin 7                                                                                              | 9                    | 40                    | 2.727759    | 0.036465 |
| IPI00218414.5                                              | CA2       | carbonic anhydrase II                                                                                  | 98                   | 384                   | 2.404881    | 0.007074 |
| IPI00017855.1                                              | ACO2      | aconitase 2, mitochondrial                                                                             | 22                   | 83                    | 2.315495    | 0.016882 |

| Protein                                                   | Gene Name | Full Gene Name                               | Pre-Treatment counts | Post-Treatment counts | Fold-change | p-value  |
|-----------------------------------------------------------|-----------|----------------------------------------------|----------------------|-----------------------|-------------|----------|
| <b>Proteins with lower spectral counts post-treatment</b> |           |                                              |                      |                       |             |          |
| IPI00644766.3                                             | TOR1AIP1  | torsin A interacting protein 1               | 8                    | 4                     | 3.258679    | 0.013969 |
| IPI00021891.5                                             | FGG       | fibrinogen gamma chain                       | 20                   | 10                    | 3.258679    | 0.018157 |
| IPI00045511.1                                             | CLCC1     | chloride channel CLIC-like 1                 | 10                   | 5                     | 3.258679    | 0.024913 |
| IPI00410714.5                                             | HBA1      | hemoglobin, alpha 1                          | 314                  | 166                   | 3.082003    | 0.013969 |
| IPI00032293.1                                             | CST3      | cystatin C                                   | 15                   | 8                     | 3.055011    | 0.013969 |
| IPI00157820.3                                             | TXNRD2    | thioredoxin reductase 2                      | 7                    | 4                     | 2.851344    | 0.027473 |
| IPI00217468.3                                             | HIST1H1B  | histone cluster 1, H1b                       | 20                   | 12                    | 2.715566    | 0.027473 |
| IPI00025333.4                                             | CIAPIN1   | cytokine induced apoptosis inhibitor 1       | 11                   | 7                     | 2.560390    | 0.036465 |
| IPI00640417.1                                             | HP1BP3    | heterochromatin protein 1, binding protein 3 | 18                   | 12                    | 2.444009    | 0.024941 |
| IPI00007334.1                                             | ACIN1     | apoptotic chromatin condensation inducer 1   | 16                   | 11                    | 2.369948    | 0.027473 |
| IPI00021885.1                                             | FGA       | fibrinogen alpha chain                       | 70                   | 50                    | 2.281075    | 0.008418 |
| IPI00010675.1                                             | TFF2      | trefoil factor 2                             | 104                  | 75                    | 2.259351    | 0.004005 |
| IPI00011695.8                                             | PRSS2     | protease, serine, 2 (trypsin 2)              | 12                   | 9                     | 2.172452    | 0.020737 |
| IPI00180240.2                                             | TMSL3     | thymosin-like 3                              | 19                   | 15                    | 2.063830    | 0.013969 |
| IPI00008418.6                                             | DIABLO    | diablo homolog (Drosophila)                  | 10                   | 8                     | 2.036674    | 0.009594 |

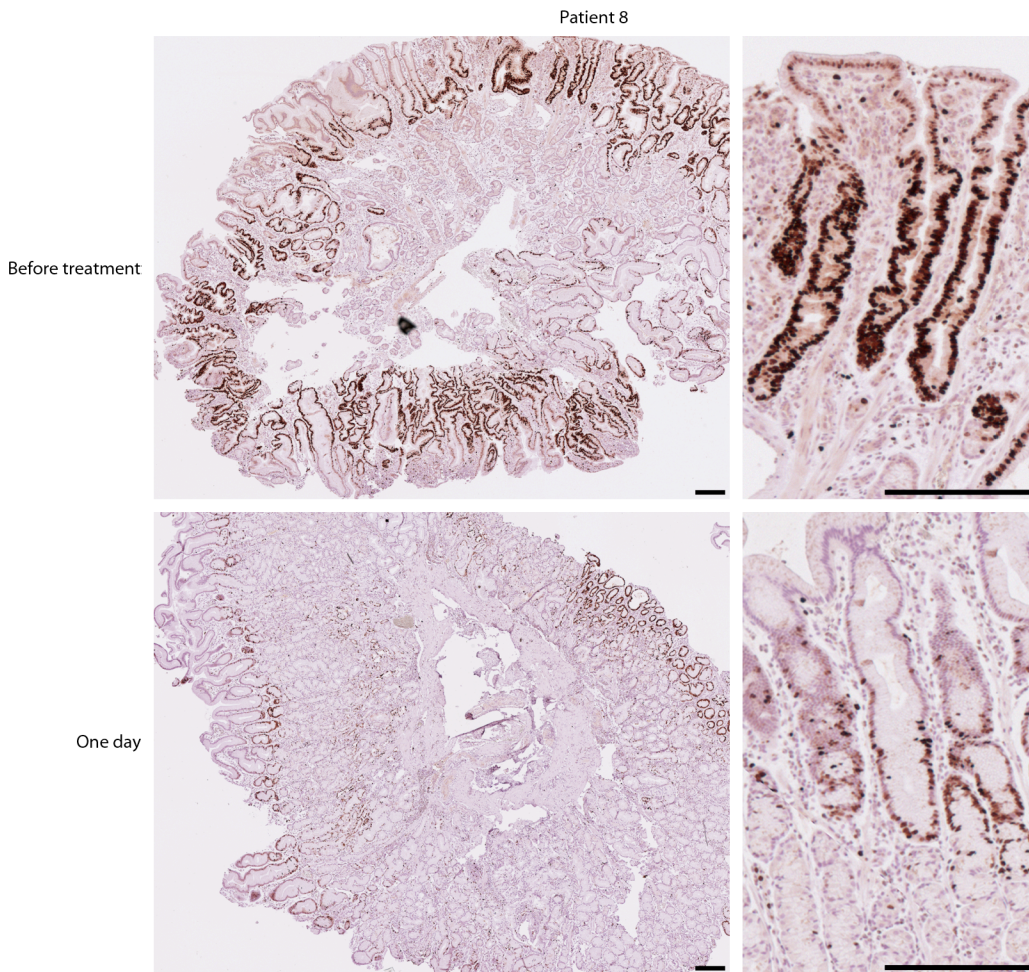

**Fig. S1.** Decreased proliferation in gastric mucosa of patient 8 one day after first dose of cetuximab. Although this patient opted to leave the trial after one treatment, there was a marked decrease in Ki-67 staining in the involved gastric mucosa. Scale bar is 250 microns.

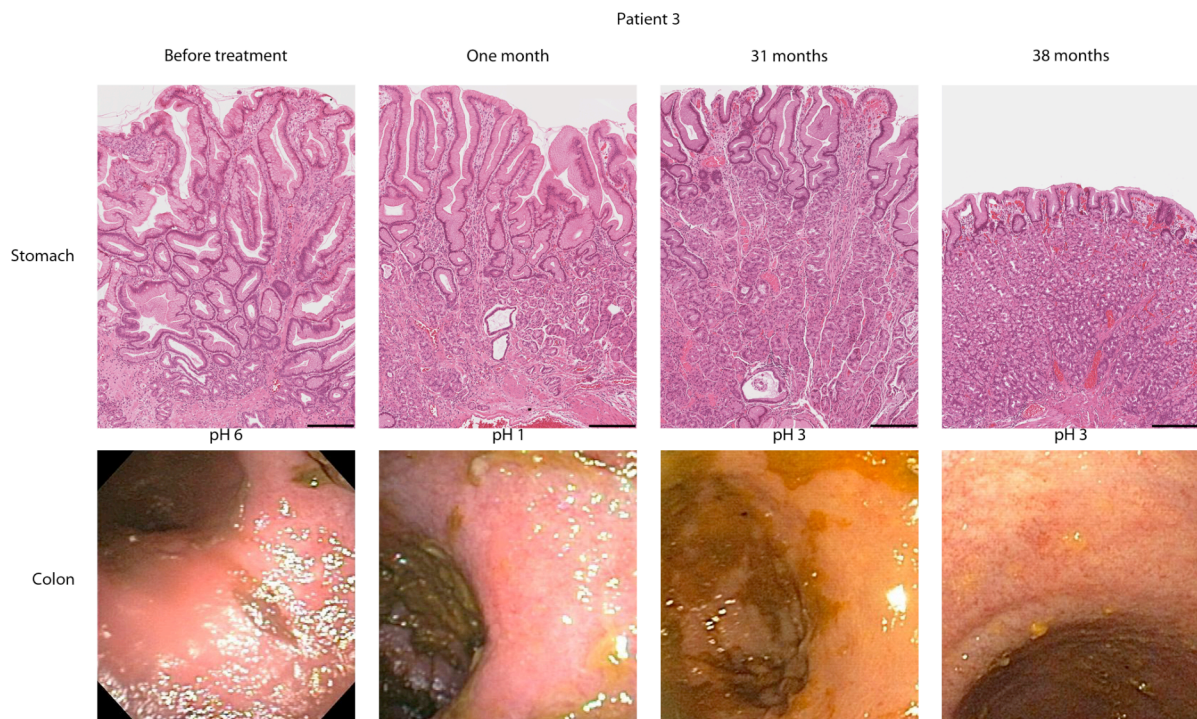

**Fig. S2.** Long term changes in the stomach and colon of patient 3. (A) Patient 3 demonstrated partial improvement in foveolar hyperplasia after one month of treatment (top panel). Foveolar hyperplasia continued to regress further with long term cetuximab therapy, along with restoration of normal gastric glandular architecture and improved gastric acidity. Scale bar is 250 microns. (B) There was no evidence of increased severity of ulcerative colitis with long term cetuximab as determined by gross and microscopic (data not shown) examination of the colon at sigmoidoscopy.



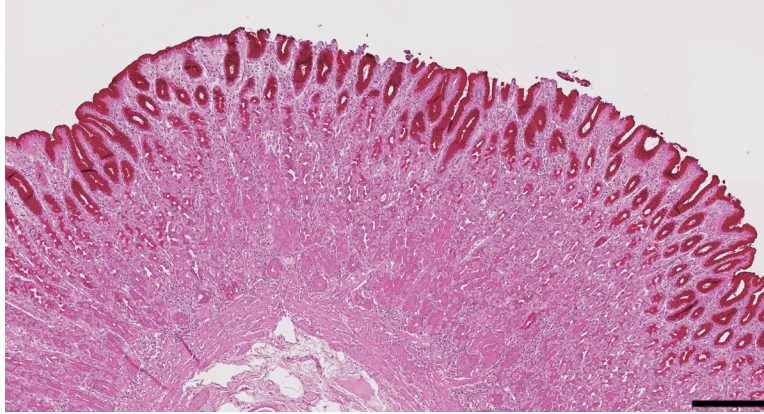

**Fig. S3.** Patient 4 had histologically normal stomach at gastrectomy. Scale bar is 250 microns.

## Case Series

### Patient 1

A 79-year-old woman traveled from Lebanon to Vanderbilt University Medical Center to enter the trial. She had experienced one and a half years of severe epigastric pain associated with nausea and vomiting, as well as peripheral edema. During the one-month course of cetuximab, her symptoms and edema resolved. She elected to continue cetuximab infusions without any apparent complications every two weeks for 18 months. At that time, a repeat gastroscopy showed a grossly and histologically normal stomach. As a result, cetuximab was discontinued, and she has continued to be asymptomatic for one year. Nine months after discontinuing cetuximab, the stomach was grossly normal at gastroscopy with a gastric pH of 1, and there was minimal foveolar hyperplasia histologically.

### Patient 2

A 48-year-old woman from Tennessee with a history of ankylosing spondylitis presented with six months of nausea and hypoalbuminemia that failed to respond to medical therapy. An upper endoscopy demonstrated findings consistent with Ménétrier's disease, and she was started on cetuximab. The patient noted prompt and significant improvement in her nausea. She continued on long-term therapy, with gradual lengthening of the interval of her infusions from every two to every three weeks. After 16 months of treatment, the gastric mucosa appeared normal with a gastric pH of 2 at gastroscopy, and histologically there was minimal foveolar hyperplasia. As a result, cetuximab was discontinued, and her symptoms have continued to be well controlled for 4 months since stopping treatment.

### Patient 3

A 28-year-old male from South Carolina with a two-year history of pancolonic ulcerative colitis presented with burning epigastric pain, along with nausea and vomiting approximately twice per week. He developed lower extremity swelling and hypoalbuminemia. His ulcerative colitis had been previously treated with balsalazide, 6-MP and infliximab, but he was only treated with 6-MP at the time of enrollment in the trial. The patient had a marked reduction in his abdominal pain and nausea after starting cetuximab and has continued maintenance cetuximab infusions for more than 3 years. Follow-up upper endoscopies have revealed continued improvement in the thickened folds and mucous formation. He has also exhibited emergence of parietal cells on gastric biopsy with an associated reduction in his gastric pH from 6 at baseline to between 1 and 3 on follow-up. Histologically, the patient continues to show progressive improvement in the degree of foveolar hyperplasia, even after completing more than three years of treatment. His most recent gastroscopy, performed after 38 months of treatment, showed minimal foveolar hyperplasia and a gastric pH of 3.

### Patient 4

A 41-year-old male from New Jersey presented with several years of dull, aching abdominal pain and intermittent lower extremity edema with hypoalbuminemia. Upon treatment with cetuximab, the patient had marked improvement in his abdominal pain, nausea and vomiting. After one month, there was reduced thickness of the gastric folds, regression of foveolar hyperplasia, and emergence of parietal cells with restoration of gastric acidity. He continued on cetuximab infusions for 9 months for control of abdominal pain. He elected to undergo total gastrectomy at that time due to excess fatigue that he attributed to cetuximab and anxiety about

the development of gastric cancer. At the time of gastrectomy, his stomach was grossly and histologically normal (Fig. S3).

#### Patient 5

A 51-year-old female from California with a long standing history of mild pancolonic ulcerative colitis treated with prednisone presented with one and a half years of progressive nausea and vomiting, anasarca to her waist, and fatigue associated with hypoalbuminemia. Due to her inability to maintain adequate oral intake, she required total parenteral nutrition and regular intravenous albumin infusions. During treatment, her symptoms improved, and parenteral nutrition and intravenous albumin infusions were discontinued. Cetuximab was discontinued after approximately two years of treatment. Approximately one year following discontinuation of cetuximab, a 4-cm gastric lesion containing high grade dysplasia was found at the time of surveillance gastroscopy, and she subsequently underwent total gastrectomy.

#### Patient 6

A 58-year-old male from California presented with iron deficiency anemia, and subsequent endoscopy demonstrated findings consistent with Ménétrier's disease. Prior to enrollment in the clinical trial, the patient was dependent upon regular packed red blood cell transfusions (despite intravenous iron supplementation), requiring a total of 11 units over the three months prior to enrollment. After the initial two infusions of cetuximab, the patient's hemoglobin stabilized, and he required no further transfusions for the duration of the month-long trial. The patient continued to receive cetuximab infusions every two weeks for approximately 4 months with no need for blood transfusions. Treatment was discontinued when the patient elected to undergo



total gastrectomy because of the premalignant nature of Ménétrier's disease. He did not receive cetuximab infusions for the three months prior to his gastrectomy; during this time, his hemoglobin dropped to 6.6 g/dL, requiring him to receive repeated transfusions.

#### Patient 7

A 33-year-old man from Arizona with a seven-year history of pancolonic ulcerative colitis presented with abdominal pain, nausea, vomiting, and severe anasarca. His ulcerative colitis had been previously treated with 6-MP and three doses of infliximab prior to the diagnosis of Ménétrier's disease. At the time of enrollment into the cetuximab trial, he was only being treated with prednisone. Due to hypoalbuminemia and an inability to maintain adequate nutritional intake, he had a percutaneous feeding tube placed and was also started on total parenteral nutrition. His nausea and vomiting decreased with cetuximab treatment, and he was able to discontinue total parental nutrition. He continued on therapy for 8 months. However, he had a significant infusion reaction to cetuximab, and elected to proceed to gastrectomy. He tolerated the operation well and had almost immediate improvement in his edema. Since his gastrectomy, he has had no return of symptoms and has returned to an active lifestyle.

#### Patient 8

A 57-year-old woman from New Jersey with a 30-year history of pancolonic ulcerative colitis presented with lower extremity edema, hypoalbuminemia, and nausea. Her ulcerative colitis had been previously treated with various 5-ASA agents, prednisone, budesonide, cortisone enemas, and 6-MP, but she was only on sulfasalazine and prednisone at the time of enrollment. A diagnosis of Ménétrier's disease was established and the patient elected to enter the clinical trial.

After one infusion, the patient elected to discontinue participation in the trial; however, she had not suffered any objective adverse events or toxicity related to the medication. She ultimately proceeded to gastrectomy, which she tolerated well.

#### Patient 9

A 54-year-old man from Maryland presented with epigastric abdominal pain that was responsive to non-steroidal anti-inflammatory drugs. An upper endoscopy demonstrated large gastric folds, and histological evaluation showed foveolar hyperplasia with a gastric pH of 7. The patient was enrolled in the clinical trial, and received two infusions of cetuximab with no improvement in his abdominal pain. After the second infusion, his initial baseline biopsies were reviewed by M.K.W. and a focus of gastric cancer was found. As a result, the patient withdrew from the study and returned home for additional treatment of his cancer.
